# Supplementary material for: Functional Expression of the Recombinant Spike Receptor Binding Domain of SARS-CoV-2 Omicron in the Periplasm of Escherichia coli
Source: MDPI journal article supplement (doi:10.3390/bioengineering9110670), 2022-11-10
Supplement: s1 [file s1]

**Table S1. Primers used for cloning of sotrovimab and CR3022**

| <b>Primer name</b> | <b>Primer nucleotide sequence (5' → 3')</b>                                                                |
|--------------------|------------------------------------------------------------------------------------------------------------|
| JS#324             | CGC AGC GAG CGC GCA CTC CCA GGT GCA GCT GGT GCA GAG CGG AGC GGAA                                           |
| JS#325             | GGG GTA GCC GCT GGC CTT GCA GCT CAC CTT CAC GCT GGC ACC GGG CTT CTT CAC TTC CGC TCC GCT CTG C              |
| JS#326             | GCC AGC GGC TAC CCC TTC ACC TCC TAC GGC ATC AGC TGG GTG AGG CAG GCC CCA GGA CAA GGT CTG GAG T              |
| JS#327             | ACT TCT GGG CGT AGT TGG TGT TTC CCT GGT AGG TGC TGA TCC AGC CCA TCC ACT CCA GAC CTT GTC CTG G              |
| JS#328             | ACC AAC TAC GCC CAG AAG TTC CAA GGC AGG GTG ACC ATG ACC ACC GAC ACC AGC ACC ACC GGC TAC A                  |
| JS#329             | CCT GGC GCA GTA GTA CAC GGC GGT GTC GTC GCT CCT CAG CCT CCT GAG CTC CAT GTA GCC GGT GGT GGT G              |
| JS#330             | GTG TAC TAC TGC GCC AGG GAC TAC ACC AGG GGC GCA TGG TTC GGC GAG AGC CTG ATC GGC GGC TTC GAC A              |
| JS#331             | GAT GGG CCC TTG GTG CTA GCG CTG CTC ACG GTA ACC AGT GTT CCC TGT CCC CAG TTG TCG AAG CCG CCG AT             |
| JS#333             | CGC AGC GAG CGC GCA CTC CGA GAT CGT TCT GAC CCA GAG CCC CGG AAC ACT GAG CCT GAG TCC CGG CGA ACG CGC CAC GC |
| JS#334             | CTG TTG ATA CCA GGC AAG AGA GGT GCT GCT CAC GGT CTG GCT GGC CCT GCA GCT AAG CGT GGC GCG TTC G              |
| JS#335             | TCT CTT GCC TGG TAT CAA CAG AAG CCA GGC CAA GCC CCC AGG CTG CTG ATC TAC GGC GCC AGC AGT AGG G              |
| JS#336             | GCG TGA AGT CGG TGC CGC TCC CGC TGC CGC TGA ACC TGT CGG GGA TGC CGG TGG CCC TAC TGC TGG CGC C              |
| JS#337             | GGC ACC GAC TTC ACG CTG ACC ATC TCA AGG CTG GAG CCC GAG GAC TTC GCC GTG TAC TAC TGC CAA CAG C              |
| JS#338             | CCT CTT GAT CTC CAC CTT AGT GCC GCC ACC AAA GGT CAG GCT GGT GTC ATG CTG TTG GCA GTA GTA CAC G              |
| APEL#1             | GCT AGC ACC AAG GGC CCA TC                                                                                 |
| APEL#2             | GAA TTC CGC TCT AGA TTA TCA TTT ACC CGG AGA CAG GGA GAG GC                                                 |
| APEL#3             | ACG GTG GCC GCA CCA TC                                                                                     |
| APEL#4             | GAA TTC CGC TCT AGA TTA TCA GCA CTC TCC CCT GTT GAA GCT C                                                  |

**A**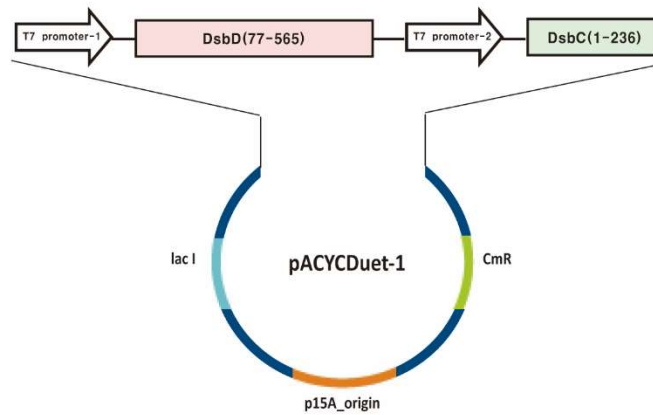**B**

MVQLPQGVWHEDEFYGKSEIYRDRLTPVTINQASAGATLTVTYQGCADAGFCYPPETKTVPLSEVVANNAAPQPVS  
 VPQQEQPTAQLPFSALWALLIGIGIAFTPCVLPMPYPLISGIVLGGKQRLSTARALLTFIYVQGMALTYTALGLVVAAGL  
 QFQAALQHPYVLIGLAIVFTLLAMSMFGLFTLQLPSSLQTRLTMSNRQQGGSPGGVFVMGAIVGLICSPCTTAPLSA  
 ILLYIAQSGNMWLGGGTLYLYALGMGLPLMLITVFGNRLLPKSGPWMEQVKTAFGFVILALPVFLLERVIGDVWGLRL  
 WSALGVAFFGWAFITSLQAKRGWMRIVQIILLAAALVSVRPLQDWAFGATHAQTQTHLNFTQIKTVDELNQALVEA  
 KGKPVMLDLYADWCVACKEFEKYTFSDPQVQKALADTVLLQANVTANDAQDVALLKHLNVLGLPTILFFDGGQGEH  
 PQARVTGFMDAETFSAHLRDRQP

**C**

MKKGFMLFTLLAAFSGFAQADDAAIQQTAKMGIKSSDIQPAPVAGMKTVLNNSGVLYITDDGKHIIQGPMYDVSGT  
 APVNVNKNMMLLKQLNALEKEMIVYKAPQEKHVITVFTDITCGYCHKLHEQMADYNALGITVRYLAFPRQGLSDAEK  
 EMKAIWCAKDKNKAFDDVMAGKSVAPASCDVDIADHYALGVQLGVSGTPAVVLSNGTLVPGYQPPKEMKEFLDEH  
 QKMTSGK

**Figure S1.** Construction of the PSY vector. **(A)** Vector map of the expression of DsbC and DsbD. The schematic domains are colored as follows: T7 promoters (white), DsbD (light red), and DsbC (light green). **(B,C)** Amino acid sequences of **(B)** DsbD and **(C)** DsbC.

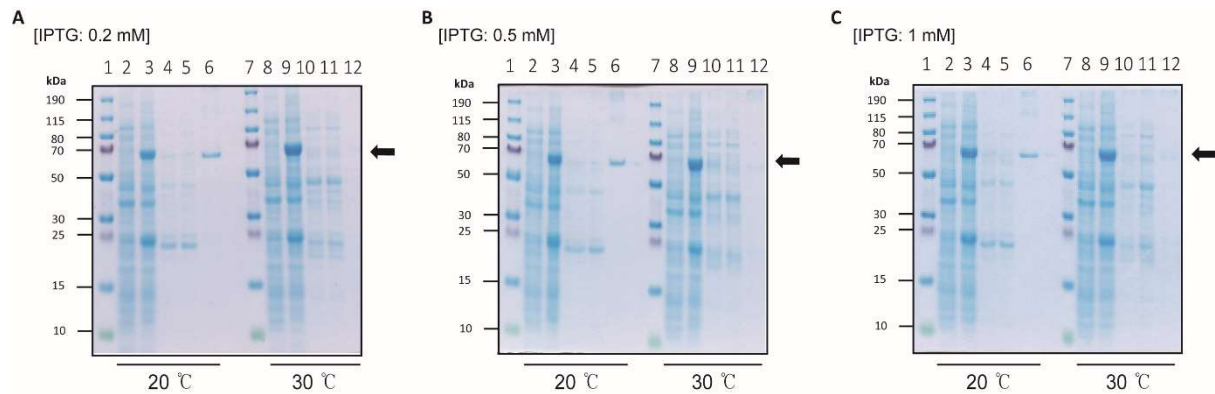

**Figure S2.** Expression of MBP-RBD<sub>omi</sub> in various culture conditions. MBP-RBD<sub>omi</sub> was expressed by the Dsb proteins-assisted periplasmic expression system. The expression of RBD<sub>omi</sub> was induced by addition of (A) 0.2 mM, (B) 0.5 mM, or (C) 1 mM IPTG for 18 hours at 20 °C or 30 °C. After expression, the cultured cells were lysed by osmotic shock to isolate the periplasmic fraction. The periplasmic fraction was loaded onto a Ni-NTA agarose column to purify MBP-RBD<sub>omi</sub>. The purification was verified by bis-tris SDS-PAGE. Black arrows indicate the band positions of the MBP-RBD<sub>omi</sub>. The lanes of SDS-PAGE are as follows: lane 1 and 7, protein size marker (Thermo); lane 2 and 8, cell lysate before IPTG induction; lane 3 and 9, cell lysate after IPTG induction; lane 4 and 10, periplasmic fraction obtained by osmotic shock; lane 5 and 11, Ni-NTA flow through fraction; lane 6 and 12, Ni-NTA elution fraction.

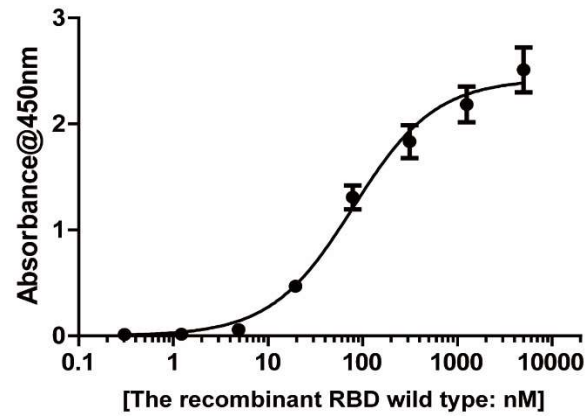

**Figure S3.** ELISA binding assay showing the affinity of hACE2-Fc for recombinant RBD of SARS-CoV-2 wild type expressed in a mammalian system. For that, 2  $\mu$ g of hACE2-Fc was immobilized on the high-binding plate for 2 hours at room temperature. After blocking using 5% skim milk, the plate was washed with 1 $\times$  PBS (pH 7.4) containing 0.1% Triton X-100 (PBST), and the serial-diluted recombinant RBD in PBST was added. To develop colorimetric signals of the binding affinity, anti-His<sub>6</sub> tag-HRP conjugate (Sigma) was added after washing the plate. The colorimetric signals were monitored at 450 nm by an Infinite M200 pro (Tecan). Error bars are  $\pm$ standard deviation of triplicate experiments.

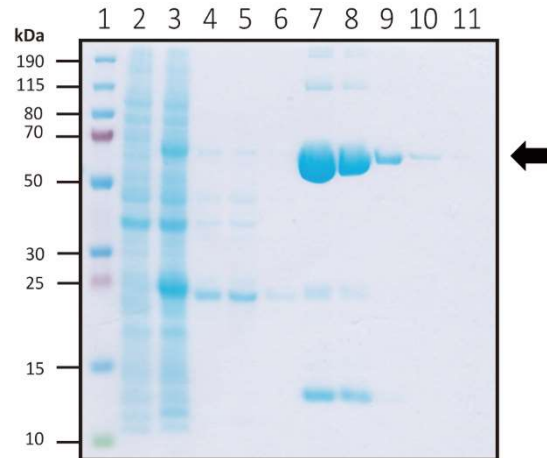

**Figure S4.** Ni-NTA purification of MBP-RBD wild type expressed by the Dsb proteins-assisted periplasmic expression system. Purification was verified by bis-tris SDS-PAGE. The black arrow indicates the band position of the MBP-RBD wild type. The lanes of SDS-PAGE are as follows: lane 1, protein size marker (Thermo); lane 2, cell lysate before IPTG induction; lane 3, cell lysate after IPTG induction; lane 4, periplasmic fraction obtained by osmotic shock; lane 5, Ni-NTA flow through fraction; lane 6, Ni-NTA wash fraction; lane 7 to 11, Ni-NTA elution fractions.
